# Supplementary material for: Influence of a novel fluorosurfactant modified PEDOT:PSS hole transport layer on the performance of inverted organic solar cells
Source: Royal Society of Chemistry journal article supplement (doi:10.1039/c2jm35646e), 2012-01-01
Supplement: c2jm35646e.pdf [file c2jm35646e.pdf]

# **Influence of novel fluorosurfactant modified PEDOT:PSS hole transport layer on the performance of inverted organic solar cells**

## **Supplementary Information**

Fang Jeng Lim<sup>1,2</sup>, Krishnamoorthy Ananthanarayanan<sup>2</sup>, Joachim Luther<sup>2,3</sup> and Ghim Wei Ho<sup>\*1</sup>

<sup>1</sup> *Department of Electrical and Computer Engineering, National University of Singapore, Blk EA #06-10, 9 Engineering Drive 1, 117575 Singapore*

<sup>2</sup> *Solar Energy Research Institute of Singapore (SERIS), National University of Singapore, 7 Engineering Drive 1, 117574 Singapore*

<sup>3</sup> *Department of Material Science and Engineering, National University of Singapore, Blk E4 #01-01, 9 Engineering Drive 1, 119260 Singapore*

\* Corresponding author email: [elehgw@nus.edu.sg](mailto:elehgw@nus.edu.sg), Tel : +65 6516 8121, Fax : + 65 6775 4710

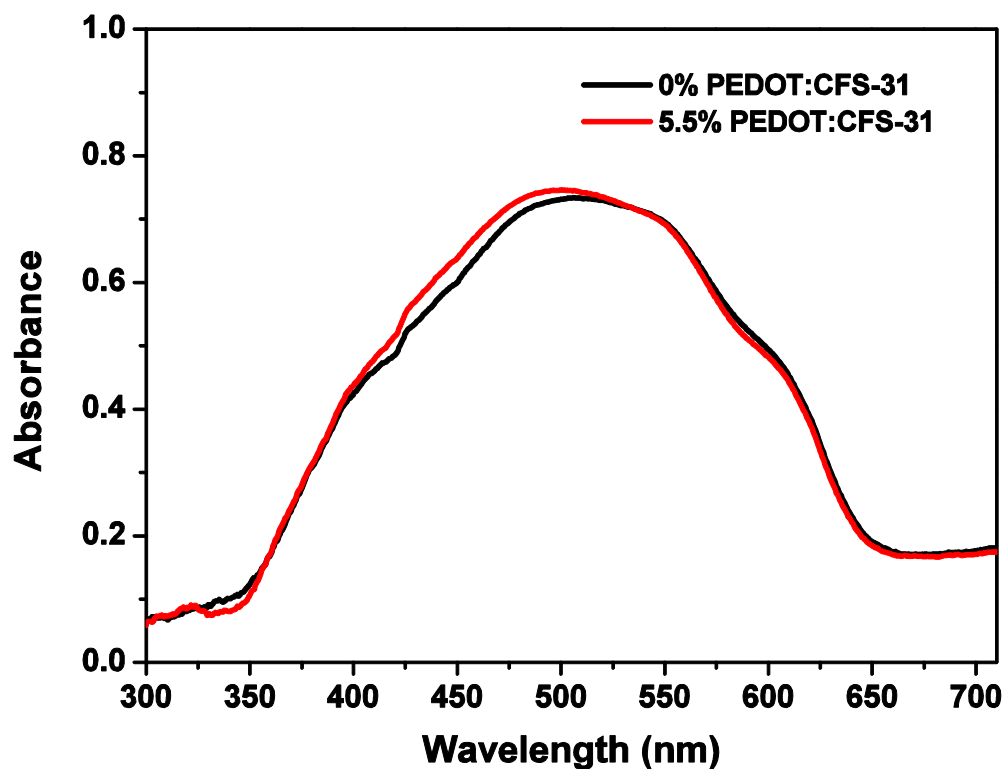

**Figure S1 Absorption spectrum of devices with 0% and 5.5% PEDOT:CFS-31 devices. The absorption of 5.5% PEDOT:CFS-31 device shows a high resemblance with respect to 0% PEDOT:CFS-31 at wavelength range between 300 and 800 nm.**

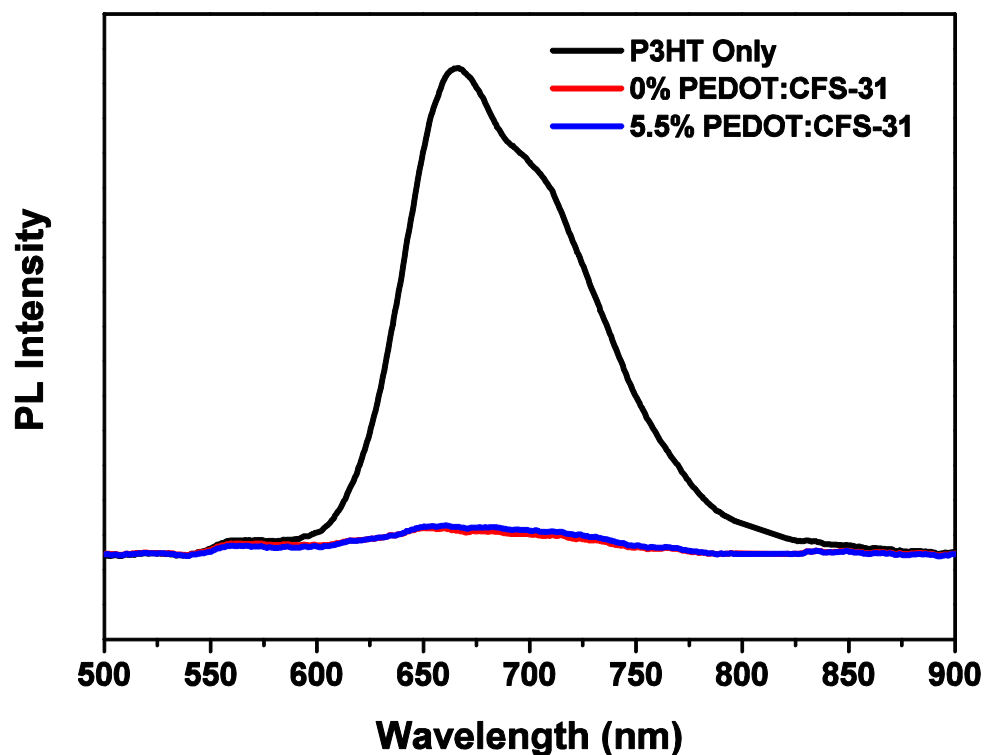

**Figure S2 Photoluminescence spectra showing P3HT only (black line), 0% PEDOT:CFS-31 (red line) and 5.5% PEDOT:CFS-31 (blue line) devices. The P3HT only device was fabricated by coating 15 mg/ml P3HT in dichlorobenzene solution on pre-cleaned ITO. The PL intensity spectra for 5.5% PEDOT:CFS-31 shows a high resemblance with respect to 0% PEDOT:CFS-31 at wavelength between 500 and 900 nm.**
